# Supplementary material for: Fluorescent polydopamine nanoparticles as a nanosensor for the sequential detection of mercury ions andl-ascorbic acid based on a coordination effect and redox reaction
Source: Royal Society of Chemistry journal article supplement (doi:10.1039/d0ra02031a), 2020-01-01
Supplement: d0ra02031a1.pdf [file d0ra02031a1.pdf]

Electronic Supplementary Material (ESI) for Analyst  
This journal is © The Royal Society of Chemistry 2013

## Supporting Information

### **Fluorescent polydopamine nanoparticles as a nanosensor for sequential detection of mercury ion and L-ascorbic acid based on coordination effect and redox reaction**

**Yi-Xuan Yang<sup>1</sup>, Yan-Zhao Fang<sup>1</sup>, Jing-Xuan Tian, Qiang Xiao\* and Xiang-Juan  
Kong\***

*Jiangxi Key Laboratory of Organic Chemistry, Jiangxi Science and Technology  
Normal University, Nanchang 330013, P. R. China\**

Email: xiaoqiang@tsinghua.org.cn; xiangjuankong@163.com

<sup>1</sup> These authors contributed equally to this work.

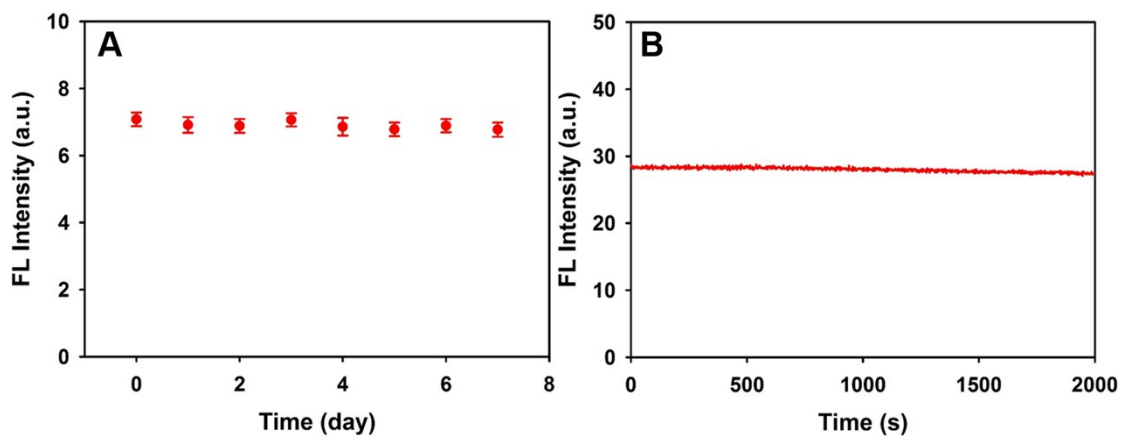

**Fig. S1** Fluorescence stability of the as-prepared PDA NPs in solutions within different days (A, 50  $\mu$ L PB (pH 7.0, 2 mM) solution+10  $\mu$ L fluorescent PDA NPs+40  $\mu$ Lsterilized water) and under continuous irradiation with 405nm excitation light (B, 50  $\mu$ L PB (pH 7.0, 2 mM) solution +50  $\mu$ L fluorescent PDA NPs ). Error bars represent standard deviation of three repetitive experiments.

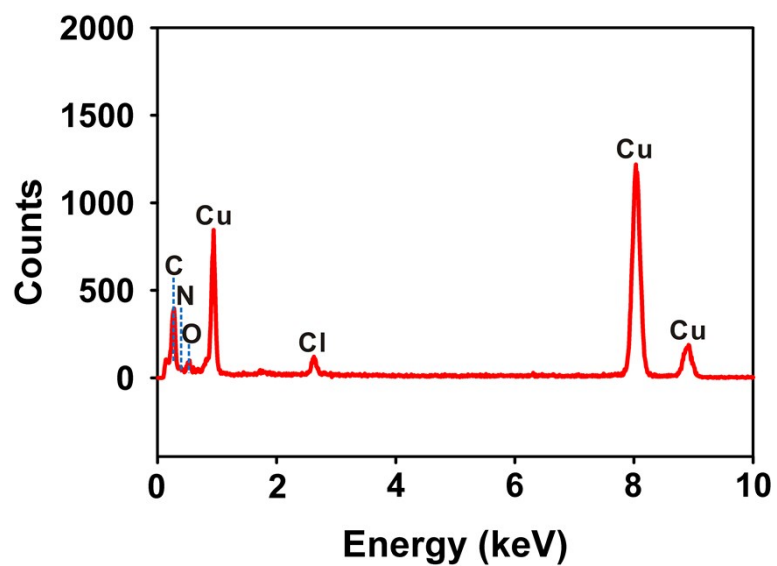

**Fig. S2** EDS spectrum of the PDA NPs, indicating the presence of elemental C, N, and O. Note that the strong signal of Cu comes from the copper TEM grid and the signal of Cl come from hydrochloric acid.

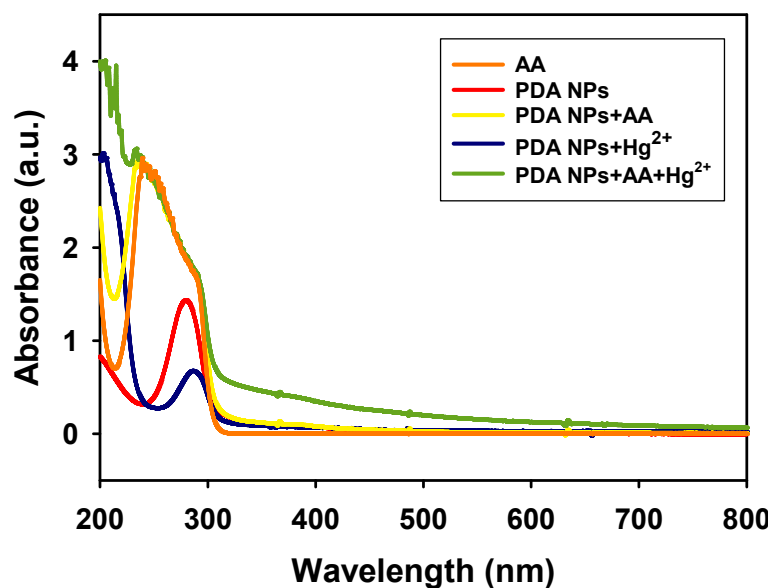

**Fig. S3** UV-Vis absorption spectrum responses of the nanoprobe in the presence of PDA NPs (red line, 50  $\mu\text{L}$  PB (pH 7.0, 2 mM) solution+40  $\mu\text{L}$  fluorescent PDA NPs+10  $\mu\text{L}$  sterilized water), PDA NPs+ $\text{Hg}^{2+}$  (blue line, 50  $\mu\text{L}$  PB (pH 7.0, 2 mM) solution+40  $\mu\text{L}$  fluorescent PDA NPs+5  $\mu\text{L}$   $\text{Hg}^{2+}$  (20 mM)+5  $\mu\text{L}$  sterilized water), PDA NPs+AA (yellow line, 50  $\mu\text{L}$  PB (pH 7.0, 2 mM) solution+40  $\mu\text{L}$  fluorescent PDA NPs+5  $\mu\text{L}$  AA (40 mM)+5  $\mu\text{L}$  sterilized water), PDA NPs+AA+  $\text{Hg}^{2+}$  (green line, 50  $\mu\text{L}$  PB (pH 7.0, 2 mM) solution+40  $\mu\text{L}$  fluorescent PDA NPs+5  $\mu\text{L}$   $\text{Hg}^{2+}$  (20 mM)+5  $\mu\text{L}$  AA (40 mM)) and AA (orange line, 50  $\mu\text{L}$  PB (pH 7.0, 2 mM) solution+5  $\mu\text{L}$  AA (40 mM)+45  $\mu\text{L}$  sterilized water).

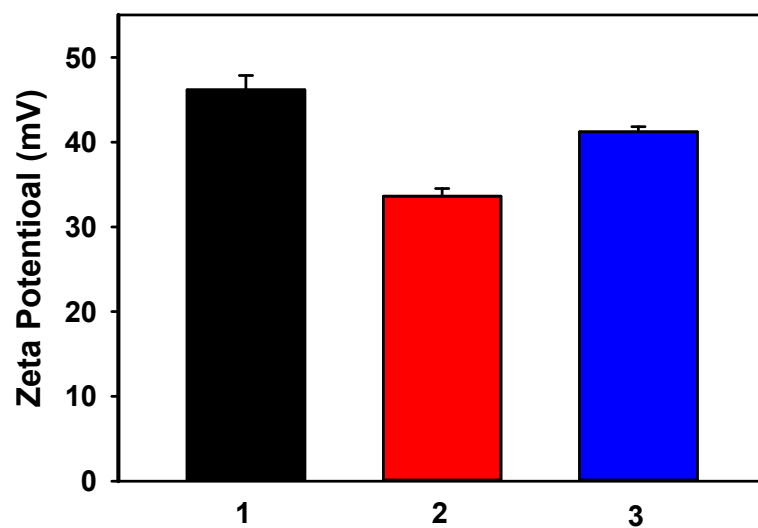

**Fig. S4** Zeta potential analysis of samples under different conditions: 1, PDA NPs; 2, PDA NPs+Hg<sup>2+</sup>; 3, PDA NPs+AA+Hg<sup>2+</sup>.

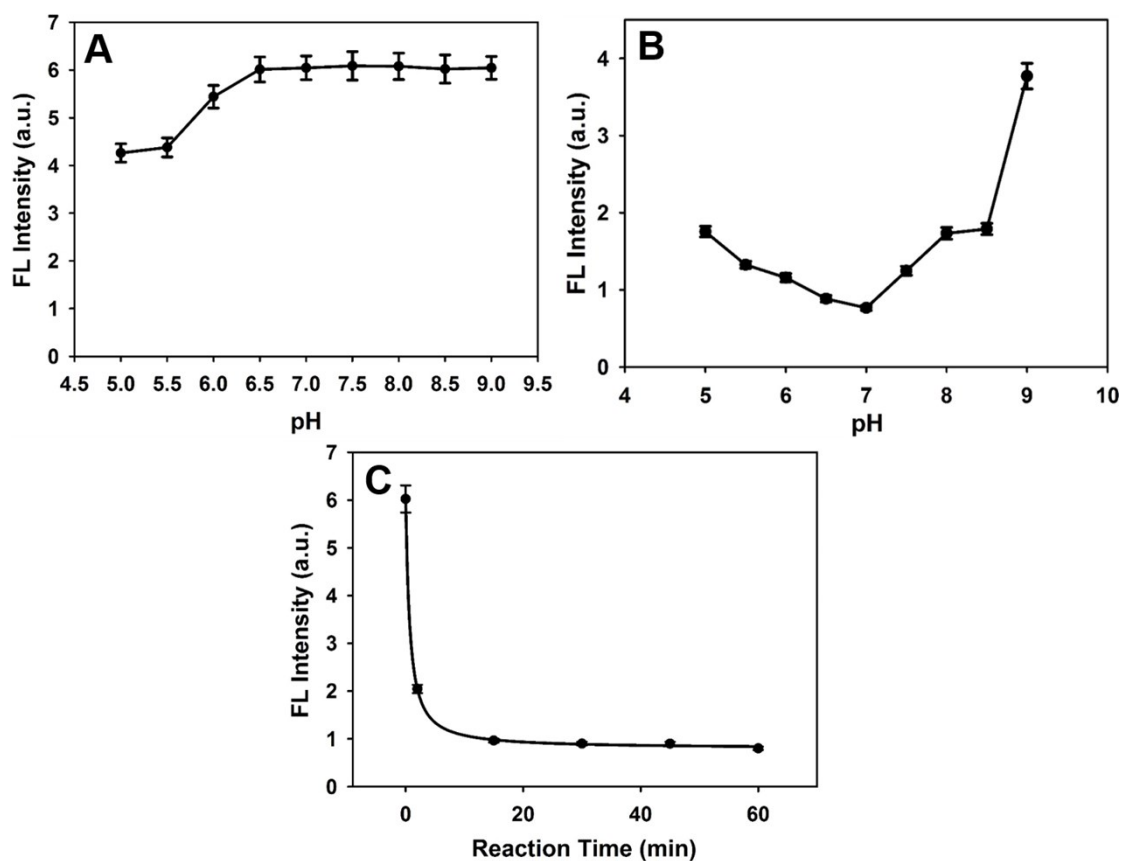

**Fig. S5** Optimization of the experimental conditions for Hg<sup>2+</sup> detection. (A) The effect of the solution pH on the fluorescence intensity of PDA NPs. (B) The effect of the solution pH on the coordination reaction between Hg<sup>2+</sup> and PDA NPs. (C) Variance of the fluorescence intensity with reaction time of the system for Hg<sup>2+</sup> detection. Error bars represent the standard deviation of three experiments.

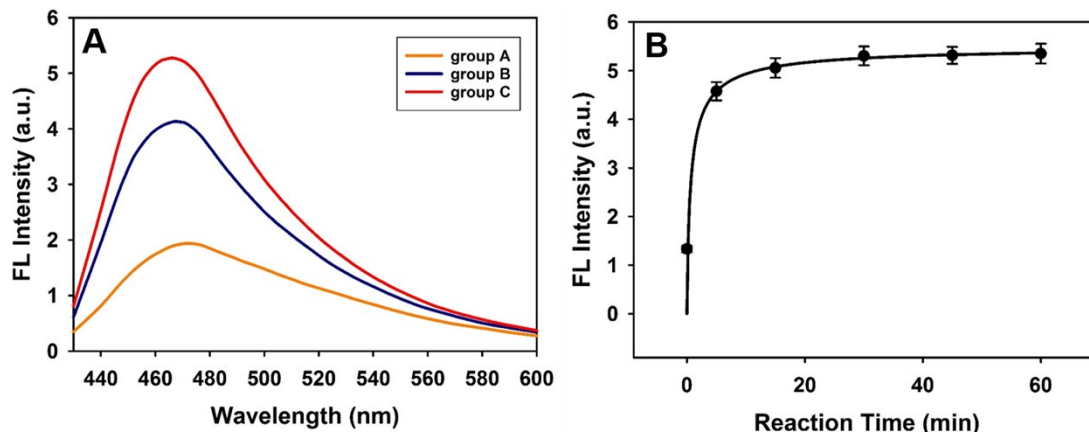

**Fig. S6** Optimization of the experimental conditions for AA detection. (A) Variance of the fluorescence intensity with the adding order of AA. Group A: firstly adding PDA NPs and  $\text{Hg}^{2+}$  for reaction 30 min and then adding AA followed by incubation for 45 min); group B: adding samples according to the order of PDA NPs,  $\text{Hg}^{2+}$  and AA, and co-incubation for 30 min; group C: adding samples according to the order of PDA NPs, AA and  $\text{Hg}^{2+}$ , and co-incubation for 30 min. (B) Variance of the fluorescence intensity with the reaction time of the system for AA detection. Error bars represent the standard deviation of three experiments.

**Table S1. Comparison of different analytical methods for AA detection sensitivity by our strategy and those previously reported in literature**

| Method           | Analyte          | Detection                  |  | Strategy                                                                                                                                         | Ref.      |
|------------------|------------------|----------------------------|--|--------------------------------------------------------------------------------------------------------------------------------------------------|-----------|
|                  |                  | Limit<br>( $\mu\text{M}$ ) |  |                                                                                                                                                  |           |
| Fluorescence     | $\text{Hg}^{2+}$ | 0.23                       |  | A “turn-off” fluorescent probe based on nitrogen-doped carbon quantum dots for detection of $\text{Hg}^{2+}$ ions                                | 1         |
| Fluorescence     | $\text{Hg}^{2+}$ | 0.15                       |  | Label-free turn-on fluorescent detection of melamine based on the anti-quenching ability of $\text{Hg}^{2+}$ to gold nanoclusters                | 2         |
| Colorimetry      | $\text{Hg}^{2+}$ | 2.2                        |  | Highly selective $\text{Hg}^{2+}$ colorimetric sensor using green synthesized and unmodified silver nanoparticles                                | 3         |
| Fluorescence     | $\text{Hg}^{2+}$ | 0.39                       |  | A dual sensor based on cinamaldehyde and pyrimidine selective for $\text{Hg}^{2+}$ and cysteine detection                                        | 4         |
| Fluorescence     | $\text{Hg}^{2+}$ | 0.19                       |  | Fluorescent PDA NPs serving as signal indicator based on $\text{Hg}^{2+}$ -induced fluorescence quenching and AA-triggered fluorescence recovery | This work |
| Fluorescence     | AA               | 3                          |  | By combining the reduction reaction mediated formation of Ag NPs and the selective recognition reaction between $\text{Ag}^+$ and CdTe QDs       | 5         |
| Colorimetry      | AA               | 25                         |  | Colorimetric detection based on $\text{Cu}^{2+}$ ions were able to induce Au NRs to form high-index {200} facet                                  | 6         |
| Colorimetry      | AA               | 90                         |  | Colorimetric method based on molybdenum oxide nanosheets and AA                                                                                  | 7         |
| Electrochemistry | AA               | 0.51                       |  | Nitrogen-doped graphene-like mesoporous nanosheets from the niomass waste of okara for the amperometric detection of vitamin C                   | 8         |
| Electrochemistry | AA               | 0.5                        |  | Yttrium hexacyanoferrate microflowers on freestanding three dimensional graphene substrates                                                      | 9         |
| Fluorescence     | AA               | 0.4                        |  | Fluorescent PDA NPs serving as signal indicator based on $\text{Hg}^{2+}$ -induced fluorescence quenching and AA-triggered fluorescence recovery | This work |



**Table S2. Recovery detection of Hg<sup>2+</sup> in real samples**

|       |    | added( $\mu\text{M}$ ) | found( $\mu\text{M}$ ) | recovery | RSD(n=3) |
|-------|----|------------------------|------------------------|----------|----------|
| Tap   | 1  | 2.5                    | 2.40                   | 96.0%    | 5.9%     |
| water | 2  | 5.0                    | 4.67                   | 93.4%    | 5.0%     |
|       | 3  | 7.5                    | 8.06                   | 107.5%   | 2.3%     |
|       | 4  | 10.0                   | 9.64                   | 96.4%    | 6.2%     |
| Lake  | 5  | 2.5                    | 2.37                   | 94.8%    | 5.7%     |
| water | 6  | 5.0                    | 4.75                   | 95.0%    | 6.8%     |
|       | 7  | 7.5                    | 7.47                   | 99.6%    | 5.5%     |
|       | 8  | 10.0                   | 9.77                   | 97.7%    | 4.1%     |
| 0.5%  | 9  | 2.5                    | 2.52                   | 100.8%   | 3.7%     |
| human | 10 | 5.0                    | 5.12                   | 102.4%   | 1.0%     |
| serum | 11 | 7.5                    | 7.55                   | 100.7%   | 6.5%     |
|       | 12 | 10.0                   | 9.86                   | 98.6%    | 6.4%     |

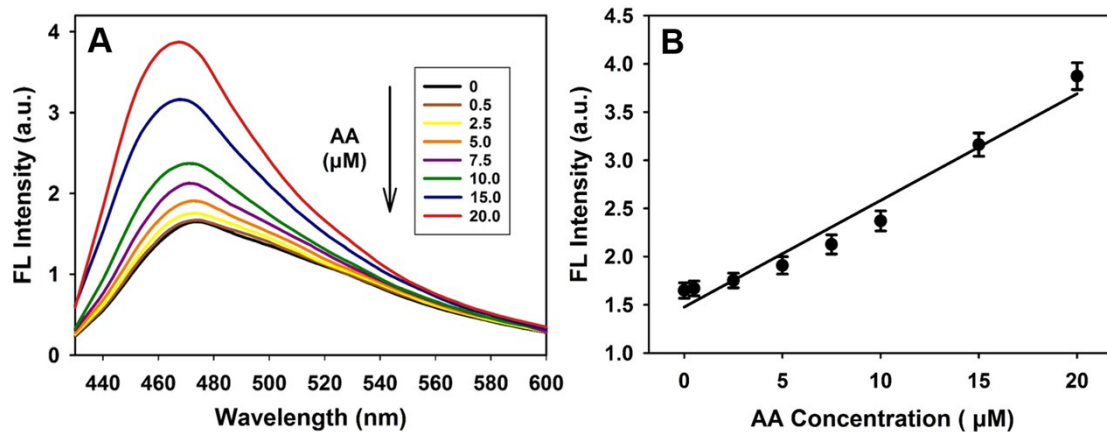

**Fig. S7** The calibration curve for AA detection in diluted serum. (A) Fluorescence spectrum responses of the PDA NPs as a function of AA (0-20  $\mu\text{M}$ ) in human serum. (B) Plot of the fluorescence intensity values against AA concentration. Error bars represent the standard deviation of three experiments.

**Table S3. Recovery detection of AA in 0.5% human serum samples**

|   | added( $\mu\text{M}$ ) | found( $\mu\text{M}$ ) | recovery | RSD(n=3) |
|---|------------------------|------------------------|----------|----------|
| 1 | 5                      | 4.79                   | 95.8%    | 4.4%     |
| 2 | 7.5                    | 7.71                   | 102.8    | 5.1%     |
| 3 | 10                     | 9.73                   | 97.3%    | 3.3%     |
| 4 | 15                     | 14.34                  | 95.6%    | 6.0%     |

References:

1. R. Zhang and W. Chen, *Biosens. Bioelectron.*, 2014, **55**, 83-90.
2. H. Dai, Y. Shi, Y. Wang, Y. Sun, J. Hu, P. Ni, and L. Zhuang, *Biosens. Bioelectron.*, 2014, **53**, 76-81.
3. K. Farhadi, M. Forough, R. Molaei, S. Hajizadeh and A. Rafipour, *Sens. Actuators B: Chem.*, 2012, **161**, 880-885.
4. J. M. Jung, C. Kim and R. G. Harrison, *Sens. Actuators B: Chem.*, 2018, **255**, 2756-2763.
5. P. Chen, S. Yan, E. Sawyer, B. Ying, X. Wei, Z. Wu and J. Geng, *Analyst*, 2019, **144**, 1147-1152.
6. S. Xu, X. Dong, S. Chen, Y. Zhao, G. Shan, Y. Sun, Y. Chen and Y. Liu, *Sens. Actuators B: Chem.*, 2019, **281**, 375-382.
7. R. Li, H. An, W. Huang and Y. He, *Sens. Actuators B: Chem.*, 2018, **259**, 59-63.
8. T. Sha, J. Liu, M. Sun, L. Li, J. Bai, Z. Hu and M. Zhou, *Talanta*, 2019, **200**, 300-306.
9. A. Hatamie, R. Rahmati, E. Rezvani, S. Angizi and A. Simchi, *ACS Appl. Nano Mater.*, 2019, **2**, 2212-2221.
